# Supplementary material for: Stable LATP/LAGP double-layer solid electrolyte prepared via a simple dry-pressing method for solid state lithium ion batteries
Source: Royal Society of Chemistry journal article supplement (doi:10.1039/c6ra19415j), 2016-01-01
Supplement: c6ra19415j1.pdf [file c6ra19415j1.pdf]

## Supplementary Information

### Stable LATP/LAGP double-layer solid electrolyte prepared via a simple dry-pressing method for solid state lithium ion batteries

Erqing Zhao<sup>a</sup>, Furui Ma<sup>a,b</sup>, Yudi Guo<sup>c</sup>, Yongcheng Jin<sup>a,\*</sup>

<sup>a</sup> Qingdao Key Laboratory of Solar Energy Utilization and Energy Storage Technology, Qingdao Institute of Bioenergy and Bioprocess Technology, Chinese Academy of Sciences, Qingdao, 266101, PR China

<sup>b</sup> University of Chinese Academy of Sciences, Beijing 100190, P. R. China

<sup>c</sup> Key Laboratory of Marine Environmental Corrosion and Bio-fouling, Institute of Oceanology, Chinese Academy of Sciences, Qingdao 266071, PR China

\* Corresponding author: Prof. Yongcheng Jin

E-mail: jinye@qibebt.ac.cn

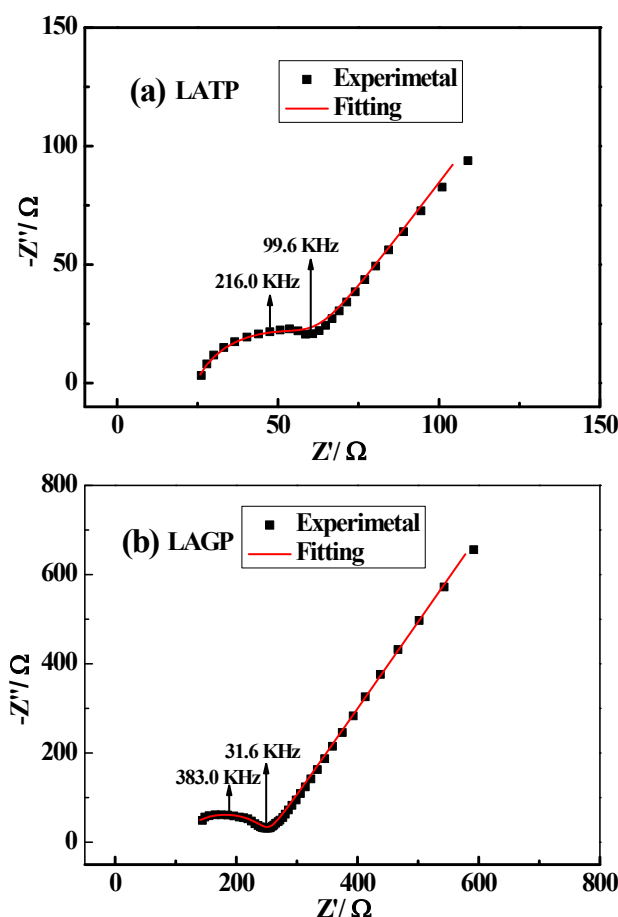

Fig. S1 The typical Nyquist plots of LATP and LAGP electrolytes measured at 25 °C.

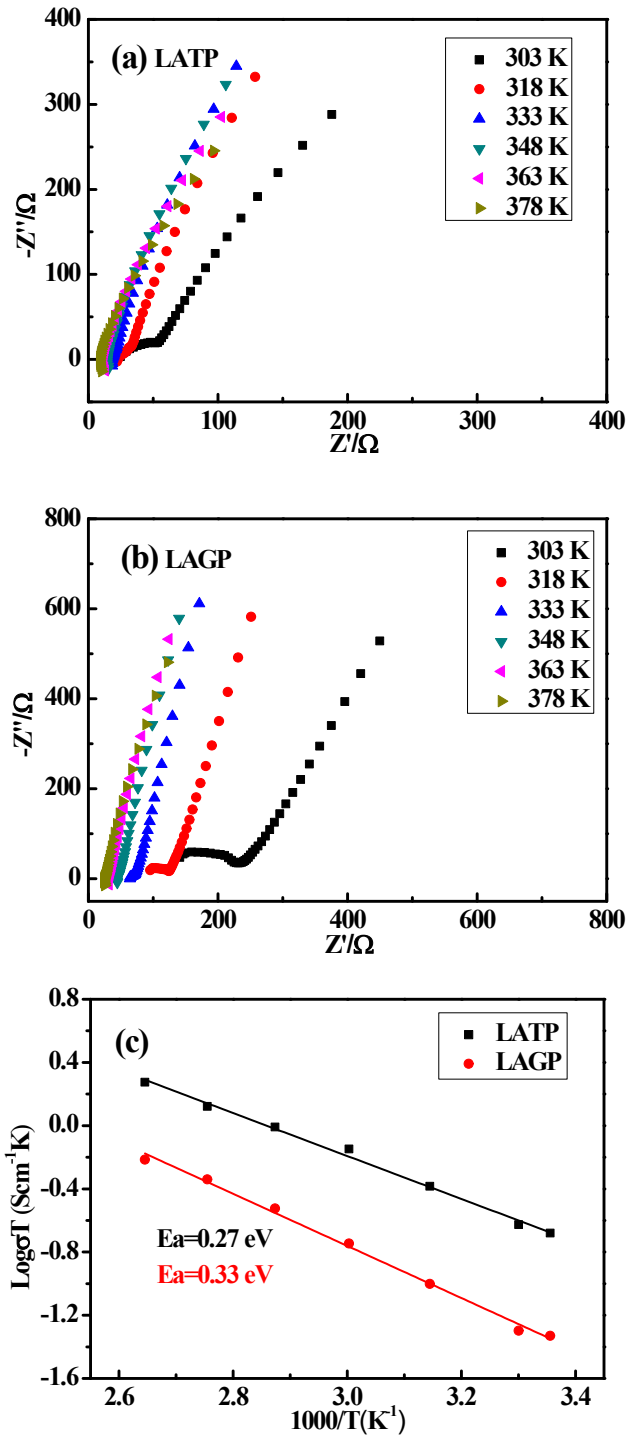

Fig. S2 (a) The complex impedance spectra of LATP sample measured in the range of 303 K to 378 K; (b) The complex impedance spectra of LAGP sample measured in the range of 303 K to 378 K; (c) The Arrhenius plots for the relationship between the total electrical conductivity and the inverse temperature.
